# Supplementary material
Source: PubMed Central journal article supplement (PMC6327305)
Supplement: NIHMS999095-supplement-Supplemental_table_S1.pdf [file NIHMS999095-supplement-Supplemental_table_S1.pdf]

**Supplemental Table S1:** List of 1124 genes whose binding to eIF4E was induced by radiation

| <b>Fold Increase</b> | <b>Gene Symbol</b> | <b>Gene Description</b>                                                                                                                          |      |         |                                                                              |
|----------------------|--------------------|--------------------------------------------------------------------------------------------------------------------------------------------------|------|---------|------------------------------------------------------------------------------|
|                      |                    |                                                                                                                                                  | 1.5  | AP4M1   | adaptor-related protein complex 4, mu 1 subunit                              |
| 2.2                  | ABCA11             | ATP-binding cassette, sub-family A (ABC1), member 11 (pseudogene)                                                                                | 1.7  | APBB1   | amyloid beta (A4) precursor protein-binding, family B, member 1 (Fe65)       |
| 3.1                  | ABHD4              | abhydrolase domain containing 4                                                                                                                  | 2    | APLP2   | amyloid beta (A4) precursor-like protein 2                                   |
| 1.9                  | ABHD6              | abhydrolase domain containing 6                                                                                                                  | 1.5  | APOL3   | apolipoprotein L, 3                                                          |
| 1.5                  | ABT1               | activator of basal transcription 1                                                                                                               | 1.5  | APTX    | aprataxin                                                                    |
| 1.8                  | ACAD8              | acyl-Coenzyme A dehydrogenase family, member 8                                                                                                   | 2.9  | ARF3    | ADP-ribosylation factor 3                                                    |
| 1.8                  | ACAT1              | acetyl-Coenzyme A acetyltransferase 1 (acetoacetyl Coenzyme A thiolase)                                                                          | 1.5  | ARL6IP5 | ADP-ribosylation-like factor 6 interacting protein 5                         |
| 1.7                  | ACOT7              | acyl-CoA thioesterase 7                                                                                                                          | 10.8 | ARPC2   | actin related protein 2/3 complex, subunit 2, 34kDa                          |
| 1.5                  | ACOT9              | acyl-CoA thioesterase 9                                                                                                                          | 1.5  | ARRB2   | arrestin, beta 2                                                             |
| 1.6                  | ACTR5              | ARP5 actin-related protein 5 homolog (yeast)                                                                                                     | 1.8  | ASB13   | ankyrin repeat and SOCS box-containing 13                                    |
| 3                    | ADCK2              | aarF domain containing kinase 2                                                                                                                  | 11.2 | ASCIZ   | ATM/ATR-Substrate Chk2-Interacting Zn2+-finger protein                       |
| 1.8                  | ADPGK              | ADP-dependent glucokinase                                                                                                                        | 2.3  | ATP1B3  | ATPase, Na+/K+ transporting, beta 3 polypeptide                              |
| 2.4                  | ADSL               | adenylosuccinate lyase                                                                                                                           | 1.7  | ATP5B   | ATP synthase, H+ transporting, mitochondrial F1 complex, beta polypeptide    |
| 2.2                  | AGPAT2             | 1-acylglycerol-3-phosphate O-acyltransferase 2 (lysophosphatidic acid acyltransferase, beta)                                                     | 1.6  | ATP5C1  | ATP synthase, H+ transporting, mitochondrial F1 complex, gamma polypeptide 1 |
| 1.5                  | AIM1L              | absent in melanoma 1-like                                                                                                                        | 1.5  | ATP5L   | ATP synthase, H+ transporting, mitochondrial F0 complex, subunit g           |
| 1.5                  | AKR1C2             | aldo-keto reductase family 1, member C2 (dihydrodiol dehydrogenase 2; bile acid binding protein; 3-alpha hydroxysteroid dehydrogenase, type III) | 2    | ATP6V0E | ATPase, H+ transporting, lysosomal 9kDa, V0 subunit e                        |
| 1.8                  | AKR7A2             | aldo-keto reductase family 7, member A2 (aflatoxin aldehyde reductase)                                                                           | 1.6  | ATP6V1D | ATPase, H+ transporting, lysosomal 34kDa, V1 subunit D                       |
| 4.1                  | ALKBH              | alkB, alkylation repair homolog (E. coli)                                                                                                        | 1.8  | ATP8A2  | ATPase, aminophospholipid transporter-like, Class I, type 8A, member 2       |
| 1.9                  | AMFR               | autocrine motility factor receptor                                                                                                               | 1.8  | ATPAF2  | ATP synthase mitochondrial F1 complex assembly factor 2                      |
| 1.7                  | ANAPC5             | anaphase promoting complex subunit 5                                                                                                             |      |         |                                                                              |
| 1.8                  | ANKRD40            | ankyrin repeat domain 40                                                                                                                         |      |         |                                                                              |
| 4.5                  | ANXA11             | annexin A11                                                                                                                                      |      |         |                                                                              |

|     |           |                                                                            |     |           |                                                        |
|-----|-----------|----------------------------------------------------------------------------|-----|-----------|--------------------------------------------------------|
| 2.2 | B4GALT4   | UDP-Gal:betaGlcNAc<br>beta 1,4-<br>galactosyltransferase,<br>polypeptide 4 | 7.4 | C1orf163  | chromosome 1 open<br>reading frame 163                 |
|     |           |                                                                            | 1.7 | C1orf174  | chromosome 1 open<br>reading frame 174                 |
| 8.6 | BBP       | Beta-amyloid binding<br>protein precursor                                  | 1.8 | C1orf33   | chromosome 1 open<br>reading frame 33                  |
| 2.1 | BBS4      | Bardet-Biedl syndrome 4                                                    | 4.8 | C20orf111 | chromosome 20 open<br>reading frame 111                |
| 1.7 | BCAT1     | branched chain<br>aminotransferase 1,<br>cytosolic                         | 1.7 | C20orf24  | chromosome 20 open<br>reading frame 24                 |
| 2.6 | BCL10     | B-cell CLL/lymphoma<br>10                                                  | 3   | C20orf29  | chromosome 20 open<br>reading frame 29                 |
| 4.7 | BCL2L11   | BCL2-like 11 (apoptosis<br>facilitator)                                    | 5.3 | C20orf44  | chromosome 20 open<br>reading frame 44                 |
| 3.5 | BIRC5     | baculoviral IAP repeat-<br>containing 5 (survivin)                         | 3.8 | C20orf45  | chromosome 20 open<br>reading frame 45                 |
| 2.1 | BMPR1A    | bone morphogenetic<br>protein receptor, type IA                            | 3   | C21orf91  | chromosome 21 open<br>reading frame 91                 |
| 1.7 | BNIP2     | BCL2/adenovirus E1B<br>19kDa interacting<br>protein 2                      | 4.8 | C2orf43   | chromosome 2 open<br>reading frame 43                  |
|     |           |                                                                            | 1.5 | C3orf18   | chromosome 3 open<br>reading frame 18                  |
| 1.9 | BNIP3     | BCL2/adenovirus E1B<br>19kDa interacting<br>protein 3                      | 1.7 | C3orf37   | chromosome 3 open<br>reading frame 37                  |
| 1.7 | BRE       | brain and reproductive<br>organ-expressed<br>(TNFRSF1A modulator)          | 1.8 | C5orf30   | chromosome 5 open<br>reading frame 30                  |
|     |           |                                                                            | 3.7 | C6orf106  | chromosome 6 open<br>reading frame 106                 |
| 2.3 | BTG1      | B-cell translocation gene<br>1, anti-proliferative                         | 4   | C6orf49   | chromosome 6 open<br>reading frame 49                  |
| 1.6 | C10orf57  | chromosome 10 open<br>reading frame 57                                     | 1.8 | C6orf82   | chromosome 6 open<br>reading frame 82                  |
| 2.7 | C10orf61  | chromosome 10 open<br>reading frame 61                                     | 1.6 | C7orf26   | chromosome 7 open<br>reading frame 26                  |
| 2   | C10orf97  | chromosome 10 open<br>reading frame 97                                     | 10  | C8orf30A  | chromosome 8 open<br>reading frame 30A                 |
| 1.7 | C11orf24  | chromosome 11 open<br>reading frame 24                                     | 3   | C9orf78   | chromosome 9 open<br>reading frame 78                  |
| 4.8 | C12orf41  | chromosome 12 open<br>reading frame 41                                     | 5.4 | C9orf82   | chromosome 9 open<br>reading frame 82                  |
| 1.6 | C12orf49  | chromosome 12 open<br>reading frame 49                                     | 4.1 | CABIN1    | calcineurin binding<br>protein 1                       |
| 1.6 | C12orf52  | chromosome 12 open<br>reading frame 52                                     | 6.1 | CALM1     | calmodulin 1<br>(phosphorylase kinase,<br>delta)       |
| 1.7 | C14orf138 | chromosome 14 open<br>reading frame 138                                    | 4.3 | CAMLG     | calcium modulating<br>ligand                           |
| 1.5 | C14orf172 | chromosome 14 open<br>reading frame 172                                    | 2.3 | CAMTA2    | calmodulin binding<br>transcription activator 2        |
| 1.5 | C16orf45  | chromosome 16 open<br>reading frame 45                                     | 4.7 | CASP3     | caspase 3, apoptosis-<br>related cysteine<br>peptidase |
| 1.7 | C16orf58  | chromosome 16 open<br>reading frame 58                                     | 1.8 | CASP9     | caspase 9, apoptosis-<br>related cysteine<br>peptidase |
| 1.6 | C17orf39  | chromosome 17 open<br>reading frame 39                                     | 1.5 | CAV2      | caveolin 2                                             |
| 1.8 | C19orf2   | chromosome 19 open<br>reading frame 2                                      | 2.2 | CCDC132   | coiled-coil domain<br>containing 132                   |
| 1.5 | C19orf50  | chromosome 19 open<br>reading frame 50                                     | 3.9 | CCNA1     | cyclin A1                                              |
| 8.2 | C1orf144  | chromosome 1 open<br>reading frame 144                                     |     |           |                                                        |

|     |          |                                                                                                     |      |         |                                                                                     |
|-----|----------|-----------------------------------------------------------------------------------------------------|------|---------|-------------------------------------------------------------------------------------|
| 1.7 | CCNA2    | cyclin A2                                                                                           |      |         | channel 4                                                                           |
| 1.6 | CCNB1IP1 | cyclin B1 interacting protein 1                                                                     | 2    | CLINT1  | clathrin interactor 1                                                               |
| 2.5 | CCNE2    | cyclin E2                                                                                           | 1.5  | CLN5    | ceroid-lipofuscinosis, neuronal 5                                                   |
| 1.9 | CCS      | copper chaperone for superoxide dismutase                                                           | 1.7  | CLTA    | clathrin, light polypeptide (Lca)                                                   |
| 3   | CD164    | CD164 antigen, sialomucin                                                                           | 7.5  | CNGA1   | cyclic nucleotide gated channel alpha 1                                             |
| 1.7 | CD59     | CD59 antigen p18-20 (antigen identified by monoclonal antibodies 16.3A5, EJ16, EJ30, EL32 and G344) | 2.3  | CNIH3   | cornichon homolog 3 (Drosophila)                                                    |
| 4.3 | CD63     | CD63 antigen (melanoma 1 antigen)                                                                   | 5.5  | CNP     | 2',3'-cyclic nucleotide 3' phosphodiesterase                                        |
| 1.6 | CDC2     | cell division cycle 2, G1 to S and G2 to M                                                          | 9.9  | COG2    | component of oligomeric golgi complex 2                                             |
| 4.9 | CDC25C   | cell division cycle 25C                                                                             | 1.7  | COPS2   | COP9 constitutive photomorphogenic homolog subunit 2 (Arabidopsis)                  |
| 2.2 | CDC42EP2 | CDC42 effector protein (Rho GTPase binding) 2                                                       |      |         |                                                                                     |
| 1.6 | CDCA4    | cell division cycle associated 4                                                                    | 6.1  | COPS7B  | COP9 constitutive photomorphogenic homolog subunit 7B (Arabidopsis)                 |
| 1.7 | CDKL3    | cyclin-dependent kinase-like 3                                                                      |      |         |                                                                                     |
| 1.9 | CDKN1A   | cyclin-dependent kinase inhibitor 1A (p21, Cip1)                                                    | 1.5  | COPS8   | COP9 constitutive photomorphogenic homolog subunit 8 (Arabidopsis)                  |
| 1.7 | CDKN2C   | cyclin-dependent kinase inhibitor 2C (p18, inhibits CDK4)                                           |      |         |                                                                                     |
| 1.5 | CDKN3    | cyclin-dependent kinase inhibitor 3 (CDK2-associated dual specificity phosphatase)                  | 1.9  | COQ2    | coenzyme Q2 homolog, prenyltransferase (yeast)                                      |
| 2.3 | CDYL     | chromodomain protein, Y-like                                                                        | 1.8  | COTL1   | coactosin-like 1 (Dictyostelium)                                                    |
| 2   | CENPB    | centromere protein B, 80kDa                                                                         | 3.5  | COX11   | COX11 homolog, cytochrome c oxidase assembly protein (yeast)                        |
| 3.2 | CENPO    | centromere protein O                                                                                | 1.5  | COX7A2  | cytochrome c oxidase subunit VIIa polypeptide 2 (liver)                             |
| 6.1 | CEP57    | centrosomal protein 57kDa                                                                           | 1.8  | COX7B   | cytochrome c oxidase subunit VIIb                                                   |
| 1.5 | CEPT1    | choline/ethanolamine phosphotransferase 1                                                           | 1.5  | CREB1   | cAMP responsive element binding protein 1                                           |
| 2.3 | CHCHD7   | coiled-coil-helix-coiled-coil-helix domain containing 7                                             | 2.3  | CREG1   | cellular repressor of E1A-stimulated genes 1                                        |
| 7.6 | CHEK1    | CHK1 checkpoint homolog (S. pombe)                                                                  | 2.1  | CRELD1  | cysteine-rich with EGF-like domains 1                                               |
| 3.1 | CHST10   | carbohydrate sulfotransferase 10                                                                    | 15.7 | CRI1    | CREBBP/EP300 inhibitor 1                                                            |
| 1.8 | CIDEC    | cell death-inducing DFFA-like effector c                                                            | 1.5  | CSNK1A1 | casein kinase 1, alpha 1                                                            |
| 1.6 | CINP     | cyclin-dependent kinase 2-interacting protein                                                       | 6.2  | CTBP2   | C-terminal binding protein 2                                                        |
| 2.2 | CIR      | CBF1 interacting corepressor                                                                        | 4.4  | CTDSP1  | CTD (carboxy-terminal domain, RNA polymerase II, polypeptide A) small phosphatase 1 |
| 3.1 | CLIC1    | chloride intracellular channel 1                                                                    |      |         |                                                                                     |
| 5.5 | CLIC4    | chloride intracellular                                                                              |      |         |                                                                                     |

|      |               |                                                                                        |       |         |                                                                      |
|------|---------------|----------------------------------------------------------------------------------------|-------|---------|----------------------------------------------------------------------|
| 2.5  | CTDSP2        | CTD (carboxy-terminal domain, RNA polymerase II, polypeptide A) small phosphatase 2    | 2.1   | DNAJB12 | DnaJ (Hsp40) homolog, subfamily B, member 12                         |
|      |               |                                                                                        | 1.7   | DNAJB9  | DnaJ (Hsp40) homolog, subfamily B, member 9                          |
| 1.7  | CTDSPL        | CTD (carboxy-terminal domain, RNA polymerase II, polypeptide A) small phosphatase-like | 2.1   | DNAJC17 | DnaJ (Hsp40) homolog, subfamily C, member 17                         |
|      |               |                                                                                        | 2     | DNAJC8  | DnaJ (Hsp40) homolog, subfamily C, member 8                          |
| 2.4  | CTGLF1        | centaurin, gamma-like family, member 1                                                 | 1.9   | DNAJC9  | DnaJ (Hsp40) homolog, subfamily C, member 9                          |
| 6.5  | CTH           | cystathionase (cystathionine gamma-lyase)                                              | 4.7   | DR1     | down-regulator of transcription 1, TBP-binding (negative cofactor 2) |
| 1.7  | CTSB          | cathepsin B                                                                            | 2.5   | DSTN    | destrin (actin depolymerizing factor)                                |
| 1.8  | CTSS          | cathepsin S                                                                            | 4.4   | DTX2    | deltex homolog 2 (Drosophila)                                        |
| 1.9  | CXorf12       | chromosome X open reading frame 12                                                     | 1.8   | DUSP1   | dual specificity phosphatase 1                                       |
| 3.9  | CXorf15       | chromosome X open reading frame 15                                                     | 1.5   | DYNLL1  | dynein, light chain, LC8-type 1                                      |
| 5.5  | CYB5B         | cytochrome b5 type B (outer mitochondrial membrane)                                    | 1.8   | DYNLT1  | dynein, light chain, Tctex-type 1                                    |
| 2.5  | CYB5R3        | cytochrome b5 reductase 3                                                              | 1.7   | DYNLT3  | dynein, light chain, Tctex-type 3                                    |
| 4.3  | DBT           | dihydrolipoamide branched chain transacylase E2                                        | 7.1   | E2F6    | E2F transcription factor 6                                           |
| 24.9 | DCLRE1B       | DNA cross-link repair 1B (PSO2 homolog, <i>S. cerevisiae</i> )                         | 1.6   | EBAG9   | estrogen receptor binding site associated, antigen, 9                |
| 1.6  | DCTD          | dCMP deaminase                                                                         | 3.9   | EEF1B2  | eukaryotic translation elongation factor 1 beta 2                    |
| 2.2  | DCTN4         | dynactin 4 (p62)                                                                       | 1.5   | EFCAB2  | EF-hand calcium binding domain 2                                     |
| 2.9  | DCTN5         | dynactin 5 (p25)                                                                       | 165.8 | EFEMP2  | EGF-containing fibulin-like extracellular matrix protein 2           |
| 1.6  | DDX19A        | DEAD (Asp-Glu-Ala-As) box polypeptide 19A                                              | 3.2   | EFNA4   | ephrin-A4                                                            |
| 1.6  | DDX28         | DEAD (Asp-Glu-Ala-Asp) box polypeptide 28                                              | 1.8   | EGFL9   | EGF-like-domain, multiple 9                                          |
| 3.1  | DDX50         | DEAD (Asp-Glu-Ala-Asp) box polypeptide 50                                              | 3.7   | EI24    | etoposide induced 2.4 mRNA                                           |
| 1.7  | DENND2D       | DENN/MADD domain containing 2D                                                         | 1.7   | EIF3S4  | eukaryotic translation initiation factor 3, subunit 4 delta, 44kDa   |
| 3.1  | DFFB          | DNA fragmentation factor, 40kDa, beta polypeptide (caspase-activated DNase)            | 4     | EIF5    | eukaryotic translation initiation factor 5                           |
| 1.8  | DHRS12        | dehydrogenase/reductase (SDR family) member 12                                         | 1.7   | EML2    | echinoderm microtubule associated protein like 2                     |
| 2.4  | DHRS3         | dehydrogenase/reductase (SDR family) member 3                                          | 2.3   | EMP1    | epithelial membrane protein 1                                        |
| 9.3  | DIP           | death-inducing-protein                                                                 | 4.3   | EMP2    | epithelial membrane protein 2                                        |
| 1.6  | DKFZP564K0822 | hypothetical protein DKFZp564K0822                                                     | 1.6   | ENDOGL1 | endonuclease G-like 1                                                |
| 2.9  | DMWD          | dystrophia myotonica-containing WD repeat motif                                        | 5.3   | ENOSF1  | enolase superfamily member 1                                         |
|      |               |                                                                                        | 1.7   | ENOX1   | ecto-NOX disulfide-thiol                                             |

|      |         |                                                                                                                  |      |           |                                                                        |
|------|---------|------------------------------------------------------------------------------------------------------------------|------|-----------|------------------------------------------------------------------------|
|      |         | exchanger 1                                                                                                      | 1.5  | FKBP2     | FK506 binding protein 2, 13kDa                                         |
| 3.3  | ENSA    | endosulfine alpha                                                                                                | 1.7  | FLJ22222  | hypothetical protein FLJ22222                                          |
| 2.3  | EPOR    | erythropoietin receptor                                                                                          |      |           |                                                                        |
| 1.9  | ERCC8   | excision repair cross-complementing rodent repair deficiency, complementation group 8                            | 1.8  | FN3KRP    | fructosamine-3-kinase-related protein                                  |
|      |         |                                                                                                                  | 1.5  | FOXF2     | forkhead box F2                                                        |
|      |         |                                                                                                                  | 2.3  | FRAG1     | FGF receptor activating protein 1                                      |
| 12.5 | ETF1    | eukaryotic translation termination factor 1                                                                      | 1.5  | FTH1      | ferritin, heavy polypeptide 1                                          |
| 1.6  | ETNK2   | ethanolamine kinase 2                                                                                            | 3.1  | FTHP1     | ferritin, heavy polypeptide pseudogene 1                               |
| 2.8  | ETS2    | v-ets erythroblastosis virus E26 oncogene homolog 2 (avian)                                                      | 2.5  | FTL       | ferritin, light polypeptide                                            |
| 3.2  | ETV7    | ets variant gene 7 (TEL2 oncogene)                                                                               | 7.6  | FUSIP1    | FUS interacting protein (serine/arginine-rich) 1                       |
| 7    | EXOC5   | exocyst complex component 5                                                                                      | 2.1  | FZR1      | fizzy/cell division cycle 20 related 1 (Drosophila)                    |
| 2.5  | EXOSC2  | exosome component 2                                                                                              |      |           |                                                                        |
| 3.1  | F2RL1   | coagulation factor II (thrombin) receptor-like 1                                                                 | 2    | G3BP2     | GTPase activating protein (SH3 domain) binding protein 2               |
| 1.5  | FAF1    | Fas (TNFRSF6) associated factor 1                                                                                | 12.8 | GABARAPL1 | GABA(A) receptor-associated protein like 1                             |
| 2.6  | FAHD2A  | fumarylacetoacetate hydrolase domain containing 2A                                                               | 2.7  | GAD1      | glutamate decarboxylase 1 (brain, 67kDa)                               |
|      |         |                                                                                                                  | 1.9  | GAS2L1    | growth arrest-specific 2 like 1                                        |
| 1.7  | FAM105A | family with sequence similarity 105, member A                                                                    | 2.7  | GAS6      | growth arrest-specific 6                                               |
|      |         |                                                                                                                  | 3.2  | GCDH      | glutaryl-Coenzyme A dehydrogenase                                      |
| 2.4  | FAM131A | family with sequence similarity 131, member A                                                                    | 6.9  | GDF11     | growth differentiation factor 11                                       |
| 4.7  | FAM48A  | family with sequence similarity 48, member A                                                                     | 1.5  | GENX-3414 | genethonin 1                                                           |
| 7.3  | FAM57A  | family with sequence similarity 57, member A                                                                     | 1.5  | GGA2      | golgi associated, gamma adaptin ear containing, ARF binding protein 2  |
| 2.2  | FAS     | Fas (TNF receptor superfamily, member 6)                                                                         | 1.5  | GGH       | gamma-glutamyl hydrolase (conjugase, folylpolygammaglutamyl hydrolase) |
| 1.9  | FASTK   | Fas-activated serine/threonine kinase                                                                            |      |           |                                                                        |
| 2.1  | FASTKD5 | FAST kinase domains 5                                                                                            | 1.6  | GGPS1     | geranylgeranyl diphosphate synthase 1                                  |
| 1.8  | FAU     | Finkel-Biskis-Reilly murine sarcoma virus (FBR-MuSV) ubiquitously expressed (fox derived); ribosomal protein S30 | 8.4  | GGTL4     | gamma-glutamyltransferase-like 4                                       |
|      |         |                                                                                                                  | 1.8  | GHITM     | growth hormone inducible transmembrane protein                         |
| 1.6  | FBL     | fibrillarlin                                                                                                     |      |           |                                                                        |
| 5    | FBXL4   | F-box and leucine-rich repeat protein 4                                                                          | 1.8  | GINS4     | GINS complex subunit 4 (Sld5 homolog)                                  |
| 1.7  | FBXO28  | F-box protein 28                                                                                                 | 2.2  | GLUD1     | glutamate dehydrogenase 1                                              |
| 1.7  | FBXO9   | F-box protein 9                                                                                                  | 4    | GM2A      | GM2 ganglioside activator                                              |
| 2.2  | FBXW11  | F-box and WD-40 domain protein 11                                                                                | 1.6  | GNAS      | GNAS complex locus                                                     |
| 1.6  | FDFT1   | farnesyl-diphosphate farnesyltransferase 1                                                                       | 2.2  | GNB1L     | guanine nucleotide binding protein (G                                  |

|      |           |                                                               |      |          |                                                                           |
|------|-----------|---------------------------------------------------------------|------|----------|---------------------------------------------------------------------------|
|      |           | protein), beta polypeptide 1-like                             | 3.4  | HTATIP   | HIV-1 Tat interacting protein, 60kDa                                      |
| 1.9  | GPR110    | G protein-coupled receptor 110                                | 1.9  | IDH2     | isocitrate dehydrogenase 2 (NADP+), mitochondrial                         |
| 2.3  | GPR172A   | G protein-coupled receptor 172A                               | 2.1  | IDH3B    | isocitrate dehydrogenase 3 (NAD+) beta                                    |
| 2.4  | GPR30     | G protein-coupled receptor 30                                 | 1.7  | IDI1     | isopentenyl-diphosphate delta isomerase 1                                 |
| 3    | GPX7      | glutathione peroxidase 7                                      | 1.6  | IER3     | immediate early response 3                                                |
| 2.7  | GRB10     | growth factor receptor-bound protein 10                       | 1.6  | IGFBP7   | insulin-like growth factor binding protein 7                              |
| 1.7  | GRK6      | G protein-coupled receptor kinase 6                           | 2.7  | IIP45    | invasion inhibitory protein 45                                            |
| 2    | GRPEL1    | GrpE-like 1, mitochondrial (E. coli)                          | 2    | IL11     | interleukin 11                                                            |
| 3    | GSK3A     | glycogen synthase kinase 3 alpha                              | 2.1  | IL11RA   | interleukin 11 receptor, alpha                                            |
| 4    | GTDC1     | glycosyltransferase-like domain containing 1                  | 4.1  | IL13RA1  | interleukin 13 receptor, alpha 1                                          |
| 1.6  | GTF2H2    | general transcription factor IIH, polypeptide 2, 44kDa        | 1.8  | IL15     | interleukin 15                                                            |
| 1.9  | GTF3C2    | general transcription factor IIIC, polypeptide 2, beta 110kDa | 1.6  | ING1     | inhibitor of growth family, member 1                                      |
| 1.9  | GYG1      | glycogenin 1                                                  | 5.1  | ING2     | inhibitor of growth family, member 2                                      |
| 11.8 | HCP5      | HLA complex P5                                                | 1.9  | ING4     | inhibitor of growth family, member 4                                      |
| 1.7  | HEMK1     | HemK methyltransferase family member 1                        | 1.6  | INSIG1   | insulin induced gene 1                                                    |
| 5.3  | HEXB      | hexosaminidase B (beta polypeptide)                           | 5.4  | IPO13    | importin 13                                                               |
| 1.9  | HIGD1A    | HIG1 domain family, member 1A                                 | 1.7  | IQCC     | IQ motif containing C                                                     |
| 1.6  | HINT1     | histidine triad nucleotide binding protein 1                  | 6.4  | IRX5     | iroquois homeobox protein 5                                               |
| 2.6  | HIST1H1E  | histone 1, H1e                                                | 2    | ISG20L2  | interferon stimulated exonuclease gene 20kDa-like 2                       |
| 1.7  | HIST1H2BD | histone 1, H2bd                                               | 3.9  | IVD      | isovaleryl Coenzyme A dehydrogenase                                       |
| 2.1  | HIST1H2BK | histone 1, H2bk                                               | 4.6  | JOSD1    | Josephin domain containing 1                                              |
| 1.8  | HIST1H2BM | histone 1, H2bm                                               | 2.2  | KATNA1   | katanin p60 (ATPase-containing) subunit A 1                               |
| 39.4 | HLA-F     | major histocompatibility complex, class I, F                  | 2.8  | KCTD13   | potassium channel tetramerisation domain containing 13                    |
| 1.5  | HMOX1     | heme oxygenase (decycling) 1                                  | 1.5  | KCTD14   | potassium channel tetramerisation domain containing 14                    |
| 2    | HSBP1     | heat shock factor binding protein 1                           | 1.6  | KDELR2   | KDEL (Lys-Asp-Glu-Leu) endoplasmic reticulum protein retention receptor 2 |
| 1.5  | HSD17B7P2 | hydroxysteroid (17-beta) dehydrogenase 7 pseudogene 2         | 20.5 | KDELR3   | KDEL (Lys-Asp-Glu-Leu) endoplasmic reticulum protein retention receptor 3 |
| 2.4  | HSF2BP    | heat shock transcription factor 2 binding protein             | 1.5  | KIAA0409 | KIAA0409                                                                  |
| 1.6  | HSPA4     | heat shock 70kDa protein 4                                    | 1.9  | KIF22    | kinesin family member 22                                                  |
| 1.8  | HSPBAP1   | HSPB (heat shock 27kDa) associated protein 1                  |      |          |                                                                           |
| 1.9  | HSPC111   | hypothetical protein HSPC111                                  |      |          |                                                                           |

|      |           |                                                                        |      |          |                                                                                 |
|------|-----------|------------------------------------------------------------------------|------|----------|---------------------------------------------------------------------------------|
| 1.5  | KLF2      | Kruppel-like factor 2 (lung)                                           |      |          | kinase 7 interacting protein 2                                                  |
| 2    | KLF4      | Kruppel-like factor 4 (gut)                                            | 2.1  | MAPK12   | mitogen-activated protein kinase 12                                             |
| 29.4 | KLF6      | Kruppel-like factor 6                                                  | 1.5  | MAPKAPK2 | mitogen-activated protein kinase-activated protein kinase 2                     |
| 1.6  | KPNA2     | karyopherin alpha 2 (RAG cohort 1, importin alpha 1)                   | 1.5  | MBD1     | methyl-CpG binding domain protein 1                                             |
| 1.5  | KPNA6     | karyopherin alpha 6 (importin alpha 7)                                 | 1.5  | MBIP     | MAP3K12 binding inhibitory protein 1                                            |
| 2.2  | LANCL1    | LanC lantibiotic synthetase component C-like 1 (bacterial)             | 1.7  | MCFP     | mitochondrial carrier family protein                                            |
| 2.1  | LARP6     | La ribonucleoprotein domain family, member 6                           | 1.5  | MCOLN1   | mucolipin 1                                                                     |
| 2.8  | LASS2     | LAG1 longevity assurance homolog 2 ( <i>S. cerevisiae</i> )            | 2.1  | MCP      | membrane cofactor protein (CD46, trophoblast-lymphocyte cross-reactive antigen) |
| 63.1 | LGALS1    | lectin, galactoside-binding, soluble, 1 (galectin 1)                   | 1.5  | MDH1     | malate dehydrogenase 1, NAD (soluble)                                           |
| 1.6  | LGALS8    | lectin, galactoside-binding, soluble, 8 (galectin 8)                   | 10.4 | ME2      | malic enzyme 2, NAD(+)-dependent, mitochondrial                                 |
| 1.6  | LHFP      | lipoma HMGIC fusion partner                                            | 2    | ME3      | malic enzyme 3, NADP(+)-dependent, mitochondrial                                |
| 2.8  | LITAF     | lipopolysaccharide-induced TNF factor                                  | 3.3  | MECP2    | methyl CpG binding protein 2 (Rett syndrome)                                    |
| 2    | LOC26010  | viral DNA polymerase-transactivated protein 6                          | 2.8  | MED18    | mediator of RNA polymerase II transcription, subunit 18                         |
| 2.1  | LOC441294 | similar to CTAGE6                                                      |      |          | homolog (yeast)                                                                 |
| 1.9  | LOC54103  | hypothetical protein LOC54103                                          | 5.3  | MED9     | mediator of RNA polymerase II transcription, subunit 9                          |
| 1.9  | LONRF3    | LON peptidase N-terminal domain and ring finger 3                      |      |          | homolog (yeast)                                                                 |
| 3    | LRRFIP2   | leucine rich repeat (in FLII) interacting protein 2                    | 2.4  | MEST     | mesoderm specific transcript homolog (mouse)                                    |
| 2.1  | LSM5      | LSM5 homolog, U6 small nuclear RNA associated ( <i>S. cerevisiae</i> ) | 1.7  | METTL2   | methyltransferase like 2                                                        |
| 2.7  | LYPLA1    | lysophospholipase I                                                    | 1.5  | MFN2     | mitofusin 2                                                                     |
| 1.7  | LYRM1     | LYR motif containing 1                                                 | 1.7  | MFSD5    | major facilitator superfamily domain containing 5                               |
| 2.3  | MAFF      | v-maf musculoaponeurotic fibrosarcoma oncogene homolog F (avian)       | 1.6  | MGC14376 | hypothetical protein MGC14376                                                   |
| 1.7  | MANEA     | mannosidase, endo-alpha                                                | 1.9  | MGC2752  | hypothetical protein MGC2752                                                    |
| 1.8  | MAP2K4    | mitogen-activated protein kinase kinase 4                              | 1.5  | MGST2    | microsomal glutathione S-transferase 2                                          |
| 1.5  | MAP2K5    | mitogen-activated protein kinase kinase 5                              | 1.5  | MICA     | MHC class I polypeptide-related sequence A                                      |
| 2.3  | MAP2K7    | mitogen-activated protein kinase kinase 7                              | 2.2  | MID1IP1  | MID1 interacting protein 1 (gastrulation specific G12-like (zebrafish))         |
| 1.7  | MAP3K7IP2 | mitogen-activated protein kinase kinase                                | 2.3  | MIS12    | MIS12 homolog (yeast)                                                           |

|      |         |                                                                                        |     |          |                                                                 |
|------|---------|----------------------------------------------------------------------------------------|-----|----------|-----------------------------------------------------------------|
| 1.6  | MKMK2   | MAP kinase interacting serine/threonine kinase 2                                       | 3.6 | MYNN     | myoneurin                                                       |
| 1.5  | MLL4    | myeloid/lymphoid or mixed-lineage leukemia 4                                           | 2.3 | MYO9B    | myosin IXB                                                      |
| 1.9  | MLX     | MAX-like protein X                                                                     | 1.8 | MYOHD1   | myosin head domain containing 1                                 |
| 1.9  | MLYCD   | malonyl-CoA decarboxylase                                                              | 2.4 | MYST1    | MYST histone acetyltransferase 1                                |
| 1.7  | MMD     | monocyte to macrophage differentiation-associated                                      | 8.9 | na       | similar to 60S ribosomal protein L13 (A52)                      |
| 1.5  | MMP14   | matrix metalloproteinase 14 (membrane-inserted)                                        | 2.2 | NAB1     | NGFI-A binding protein 1 (EGR1 binding protein 1)               |
| 23   | MMP9    | matrix metalloproteinase 9 (gelatinase B, 92kDa gelatinase, 92kDa type IV collagenase) | 1.7 | NADK     | NAD kinase                                                      |
| 2.7  | MPZL1   | myelin protein zero-like 1                                                             | 1.8 | NAPG     | N-ethylmaleimide-sensitive factor attachment protein, gamma     |
| 11.4 | MR1     | major histocompatibility complex, class I-related                                      | 1.5 | NDUFA5   | NADH dehydrogenase (ubiquinone) 1 alpha subcomplex, 5, 13kDa    |
| 1.5  | MRPL3   | mitochondrial ribosomal protein L3                                                     | 3.6 | NEK11    | NIMA (never in mitosis gene a)- related kinase 11               |
| 2.1  | MRPL9   | mitochondrial ribosomal protein L9                                                     | 1.5 | NEK2     | NIMA (never in mitosis gene a)-related kinase 2                 |
| 1.5  | MRPS10  | mitochondrial ribosomal protein S10                                                    | 1.5 | NFYC     | nuclear transcription factor Y, gamma                           |
| 1.7  | MRPS12  | mitochondrial ribosomal protein S12                                                    | 2.1 | NGFRAP1  | nerve growth factor receptor (TNFRSF16) associated protein 1    |
| 2.5  | MRS2L   | MRS2-like, magnesium homeostasis factor ( <i>S. cerevisiae</i> )                       | 1.9 | NGRN     | neugrin, neurite outgrowth associated                           |
| 2.8  | MT1H    | metallothionein 1H                                                                     | 1.8 | NIPSNAP1 | nipsnap homolog 1 ( <i>C. elegans</i> )                         |
| 40.7 | MT1X    | metallothionein 1X                                                                     | 2.5 | NMD3     | NMD3 homolog ( <i>S. cerevisiae</i> )                           |
| 1.7  | MTA1    | metastasis associated 1                                                                | 1.8 | NMT1     | N-myristoyltransferase 1                                        |
| 3.7  | MTHFD2L | methylenetetrahydrofolate dehydrogenase (NADP+ dependent) 2-like                       | 3.4 | NMT2     | N-myristoyltransferase 2                                        |
| 2.8  | MTO1    | mitochondrial translation optimization 1 homolog ( <i>S. cerevisiae</i> )              | 2.1 | NOSIP    | nitric oxide synthase interacting protein                       |
| 1.9  | MTRR    | 5-methyltetrahydrofolate-homocysteine methyltransferase reductase                      | 1.5 | NPAS2    | neuronal PAS domain protein 2                                   |
| 1.5  | MVK     | mevalonate kinase (mevalonic aciduria)                                                 | 6.8 | NSDHL    | NAD(P) dependent steroid dehydrogenase-like                     |
| 4.4  | MXRA7   | matrix-remodelling associated 7                                                        | 2.1 | NSMAF    | neutral sphingomyelinase (N-SMase) activation associated factor |
| 1.6  | MYCBP   | c-myc binding protein                                                                  | 4   | OAZ1     | ornithine decarboxylase antizyme 1                              |
| 1.9  | MYD88   | myeloid differentiation primary response gene (88)                                     | 1.5 | OR7E47P  | olfactory receptor, family 7, subfamily E, member 47 pseudogene |
| 2.3  | MYL4    | myosin, light polypeptide 4, alkali; atrial, embryonic                                 | 1.8 | ORC4L    | origin recognition complex, subunit 4-like (yeast)              |
|      |         |                                                                                        | 1.6 | OTUB1    | OTU domain, ubiquitin aldehyde binding 1                        |



|      |         |                                                                             |      |         |                                                                                                           |
|------|---------|-----------------------------------------------------------------------------|------|---------|-----------------------------------------------------------------------------------------------------------|
| 1.8  | P2RX5   | purinergic receptor P2X, ligand-gated ion channel, 5                        |      |         | polypeptide                                                                                               |
| 12.7 | P2RY2   | purinergic receptor P2Y, G-protein coupled, 2                               | 1.8  | PIM2    | pim-2 oncogene                                                                                            |
| 1.6  | PABPN1  | poly(A) binding protein, nuclear 1                                          | 2.3  | PIP5K1A | phosphatidylinositol-4-phosphate 5-kinase, type I, alpha                                                  |
| 1.5  | PAIP1   | poly(A) binding protein interacting protein 1                               | 2    | PKNOX1  | PBX/knotted 1                                                                                             |
| 1.8  | PAOX    | polyamine oxidase (exo-N4-amino)                                            | 2.9  | PLA2G4B | homeobox 1                                                                                                |
| 2.2  | PAX8    | paired box gene 8                                                           | 3.3  | PLAC1   | phospholipase A2, group IVB (cytosolic)                                                                   |
| 1.5  | PBX2    | pre-B-cell leukemia transcription factor 2                                  | 1.5  | PLAUR   | placenta-specific 1                                                                                       |
| 4    | PCGF2   | polycomb group ring finger 2                                                | 1.5  | PLEKHM2 | plasminogen activator, urokinase receptor                                                                 |
| 1.8  | PCLO    | piccolo (presynaptic cytomatrix protein)                                    |      |         | pleckstrin homology domain containing, family M (with RUN domain) member 2                                |
| 2.9  | PCOLCE2 | procollagen C-endopeptidase enhancer 2                                      | 1.6  | PLSCR3  | phospholipid scramblase 3                                                                                 |
| 2.1  | PCTP    | phosphatidylcholine transfer protein                                        | 2.1  | PMAIP1  | phorbol-12-myristate-13-acetate-induced protein 1                                                         |
| 9    | PCYT1A  | phosphate cytidylyltransferase 1, choline, alpha                            | 18.4 | PMP22   | peripheral myelin protein 22                                                                              |
| 2.9  | PDCD2   | programmed cell death 2                                                     | 1.9  | PMS2L3  | postmeiotic segregation increased 2-like 3                                                                |
| 1.6  | PDE10A  | phosphodiesterase 10A                                                       | 1.6  | PMS2L5  | postmeiotic segregation increased 2-like 5                                                                |
| 1.9  | PDS5A   | PDS5, regulator of cohesion maintenance, homolog A (S. cerevisiae)          | 4.8  | POLA2   | polymerase (DNA directed), alpha 2 (70kD subunit)                                                         |
| 2.1  | PEX16   | peroxisomal biogenesis factor 16                                            | 2    | POLDIP2 | polymerase (DNA-directed), delta interacting protein 2                                                    |
| 1.7  | PEX3    | peroxisomal biogenesis factor 3                                             | 6.2  | POLDIP3 | polymerase (DNA-directed), delta interacting protein 3                                                    |
| 2.4  | PFKL    | phosphofructokinase, liver                                                  | 9.4  | POLE3   | polymerase (DNA directed), epsilon 3 (p17 subunit)                                                        |
| 1.7  | PGF     | placental growth factor, vascular endothelial growth factor-related protein | 1.6  | PON3    | paraoxonase 3                                                                                             |
| 6.7  | PGGT1B  | protein geranylgeranyltransferase type I, beta subunit                      | 2.7  | POT1    | POT1 protection of telomeres 1 homolog (S. pombe)                                                         |
| 1.5  | PHB     | prohibitin                                                                  | 1.6  | PPA1    | pyrophosphatase (inorganic) 1                                                                             |
| 1.5  | PHF1    | PHD finger protein 1                                                        | 2.3  | PPFIA1  | protein tyrosine phosphatase, receptor type, f polypeptide (PTPRF), interacting protein (liprin), alpha 1 |
| 1.9  | PHF2    | PHD finger protein 2                                                        |      |         | peptidylprolyl isomerase A (cyclophilin A)                                                                |
| 1.6  | PHTF1   | putative homeodomain transcription factor 1                                 |      |         | peptidylprolyl isomerase D (cyclophilin D)                                                                |
| 15.2 | PHTF2   | putative homeodomain transcription factor 2                                 | 2.8  | PPIA    | protein phosphatase 1, regulatory subunit 7                                                               |
| 3.3  | PIAS2   | protein inhibitor of activated STAT, 2                                      | 1.6  | PPID    |                                                                                                           |
| 7.7  | PIGB    | phosphatidylinositol glycan, class B                                        | 2.5  | PPP1R7  |                                                                                                           |
| 2.5  | PIK4CB  | phosphatidylinositol 4-kinase, catalytic, beta                              |      |         |                                                                                                           |

|      |         |                                                                                                         |     |          |                                                                                                 |
|------|---------|---------------------------------------------------------------------------------------------------------|-----|----------|-------------------------------------------------------------------------------------------------|
| 4.8  | PPP2R1B | protein phosphatase 2 (formerly 2A), regulatory subunit A (PR65), beta isoform                          | 1.6 | PTPN3    | protein tyrosine phosphatase, non-receptor type 3                                               |
| 10   | PPP3R1  | protein phosphatase 3 (formerly 2B), regulatory subunit B, 19kDa, alpha isoform (calcineurin B, type I) | 1.6 | PTPN9    | protein tyrosine phosphatase, non-receptor type 9                                               |
| 2.2  | PPT2    | palmitoyl-protein thioesterase 2                                                                        | 3.9 | PTPRA    | protein tyrosine phosphatase, receptor type, A                                                  |
| 1.8  | PRG1    | proteoglycan 1, secretory granule                                                                       | 1.7 | PTTG1    | pituitary tumor-transforming 1                                                                  |
| 1.5  | PRKAB1  | protein kinase, AMP-activated, beta 1 non-catalytic subunit                                             | 7.8 | QKI      | quaking homolog, KH domain RNA binding (mouse)                                                  |
| 2.4  | PRKD3   | protein kinase D3                                                                                       | 1.9 | RAB2     | RAB2, member RAS oncogene family                                                                |
| 4.3  | PRKRIP1 | PRKR interacting protein 1 (IL11 inducible)                                                             | 2.9 | RAB23    | RAB23, member RAS oncogene family                                                               |
| 2.2  | PRPF4   | PRP4 pre-mRNA processing factor 4 homolog (yeast)                                                       | 8.8 | RABEP1   | rabaptin, RAB GTPase binding effector protein 1                                                 |
| 5.6  | PRSS23  | protease, serine, 23                                                                                    | 2   | RABL2B   | RAB, member of RAS oncogene family-like 2B                                                      |
| 1.5  | PRUNE   | prune homolog (Drosophila)                                                                              | 1.8 | RAC3     | ras-related C3 botulinum toxin substrate 3 (rho family, small GTP binding protein Rac3)         |
| 12.4 | PSKH1   | protein serine kinase H1                                                                                | 1.5 | RAD17    | RAD17 homolog (S. pombe)                                                                        |
| 1.8  | PSMA1   | proteasome (prosome, macropain) subunit, alpha type, 1                                                  | 1.8 | RAD51    | RAD51 homolog (RecA homolog, E. coli) (S. cerevisiae)                                           |
| 1.5  | PSMA7   | proteasome (prosome, macropain) subunit, alpha type, 7                                                  | 1.7 | RAD51AP1 | RAD51 associated protein 1                                                                      |
| 5.5  | PSMB4   | proteasome (prosome, macropain) subunit, beta type, 4                                                   | 1.9 | RAD9A    | RAD9 homolog A (S. pombe)                                                                       |
| 1.6  | PSMC5   | proteasome (prosome, macropain) 26S subunit, ATPase, 5                                                  | 1.7 | RALA     | v-ral simian leukemia viral oncogene homolog A (ras related)                                    |
| 2    | PSMD4   | proteasome (prosome, macropain) 26S subunit, non-ATPase, 4                                              | 6.5 | RANBP3   | RAN binding protein 3                                                                           |
| 1.7  | PSME1   | proteasome (prosome, macropain) activator subunit 1 (PA28 alpha)                                        | 1.7 | RANGAP1  | Ran GTPase activating protein 1                                                                 |
| 2    | PTP4A1  | protein tyrosine phosphatase type IVA, member 1                                                         | 2.2 | RBMS2    | RNA binding motif, single stranded interacting protein 2                                        |
| 1.6  | PTPLAD1 | protein tyrosine phosphatase-like A domain containing 1                                                 | 1.7 | RBMX2    | RNA binding motif protein, X-linked 2                                                           |
| 7.1  | PTPN11  | protein tyrosine phosphatase, non-receptor type 11 (Noonan syndrome 1)                                  | 1.5 | RCL1     | RNA terminal phosphate cyclase-like 1                                                           |
| 11.7 | PTPN2   | protein tyrosine phosphatase, non-receptor type 2                                                       | 3.7 | RCP9     | Calcitonin gene-related peptide-receptor component protein regulator of G-protein signalling 19 |
|      |         |                                                                                                         | 2.3 | RGS19    | regulator of G-protein signalling 19                                                            |
|      |         |                                                                                                         | 1.5 | RHEB     | Ras homolog enriched in brain                                                                   |
|      |         |                                                                                                         | 2.4 | RHOA     | ras homolog gene family, member A                                                               |
|      |         |                                                                                                         | 7   | RHOBTB3  | Rho-related BTB                                                                                 |

|       |         |                                                                                                      |      |          |                                                                                             |
|-------|---------|------------------------------------------------------------------------------------------------------|------|----------|---------------------------------------------------------------------------------------------|
|       |         | domain containing 3                                                                                  |      |          | homolog 1 (Drosophila)                                                                      |
| 1.8   | RHOT1   | ras homolog gene family, member T1                                                                   | 2.5  | SCPEP1   | serine carboxypeptidase 1                                                                   |
| 1.6   | RHOT2   | ras homolog gene family, member T2                                                                   | 1.5  | SDAD1    | SDA1 domain containing 1                                                                    |
| 1.6   | RIPK2   | receptor-interacting serine-threonine kinase 2                                                       | 2.1  | SDCCAG3  | serologically defined colon cancer antigen 3                                                |
| 2     | RNF146  | ring finger protein 146                                                                              | 4.8  | SEC22L1  | SEC22 vesicle trafficking protein-like 1 (S. cerevisiae)                                    |
| 1.5   | RNF41   | ring finger protein 41                                                                               |      |          |                                                                                             |
| 1.9   | RNPEPL1 | arginyl aminopeptidase (aminopeptidase B)-like 1                                                     | 15.1 | SEC23A   | Sec23 homolog A (S. cerevisiae)                                                             |
| 3.2   | RPA1    | replication protein A1, 70kDa                                                                        | 1.6  | SECISBP2 | SECIS binding protein 2                                                                     |
|       |         |                                                                                                      | 1.8  | SECTM1   | secreted and transmembrane 1                                                                |
| 2.4   | RPL13   | ribosomal protein L13                                                                                |      |          |                                                                                             |
| 2.4   | RPL18   | ribosomal protein L18                                                                                | 1.5  | SENP2    | SUMO1/sentrin/SMT3 specific peptidase 2                                                     |
| 2.6   | RPL35   | ribosomal protein L35                                                                                | 6.7  | SEPHS1   | selenophosphate synthetase 1                                                                |
| 18.5  | RPL35A  | ribosomal protein L35a                                                                               | 2.2  | SERGEF   | secretion regulating guanine nucleotide exchange factor                                     |
| 1.7   | RPS10   | ribosomal protein S10                                                                                |      |          |                                                                                             |
| 2     | RPS14   | ribosomal protein S14                                                                                |      |          |                                                                                             |
| 1.9   | RPS20   | ribosomal protein S20                                                                                | 1.5  | SET      | SET translocation (myeloid leukemia-associated)                                             |
| 3     | RPS6KA4 | ribosomal protein S6 kinase, 90kDa, polypeptide 4                                                    | 1.6  | SETDB1   | SET domain, bifurcated 1                                                                    |
| 1.5   | RPS6KB1 | ribosomal protein S6 kinase, 70kDa, polypeptide 1                                                    | 2.5  | SF4      | splicing factor 4                                                                           |
| 4.5   | RRAGD   | Ras-related GTP binding D                                                                            | 1.9  | SH2D3A   | SH2 domain containing 3A                                                                    |
| 1.5   | RRM2    | ribonucleotide reductase M2 polypeptide                                                              | 15.6 | SIAH1    | seven in absentia homolog 1 (Drosophila)                                                    |
| 1.9   | RRP15   | ribosomal RNA processing 15 homolog (S. cerevisiae)                                                  | 1.6  | SIP1     | survival of motor neuron protein interacting protein 1                                      |
| 2     | RRS1    | RRS1 ribosome biogenesis regulator homolog (S. cerevisiae)                                           | 19.4 | SIRT3    | sirtuin (silent mating type information regulation 2 homolog) 3 (S. cerevisiae)             |
| 1.7   | RSU1    | Ras suppressor protein 1                                                                             | 2.2  | SIX2     | sine oculis homeobox homolog 2 (Drosophila)                                                 |
| 1.5   | RY1     | putative nucleic acid binding protein RY-1                                                           | 1.8  | SLC12A9  | solute carrier family 12 (potassium/chloride transporters), member 9                        |
| 1.9   | S100A10 | S100 calcium binding protein A10 (annexin II ligand, calpactin I, light polypeptide (p11))           | 2.9  | SLC22A14 | solute carrier family 22 (organic cation transporter), member 14                            |
| 2     | S100A4  | S100 calcium binding protein A4 (calcium protein, calvasculin, metastasin, murine placental homolog) | 1.6  | SLC25A14 | solute carrier family 25 (mitochondrial carrier, brain), member 14                          |
| 3.1   | SAP30   | sin3-associated polypeptide, 30kDa                                                                   | 7.2  | SLC25A5  | solute carrier family 25 (mitochondrial carrier; adenine nucleotide translocator), member 5 |
| 170.9 | SAPS2   | SAPS domain family, member 2                                                                         | 2    | SLC31A1  | solute carrier family 31 (copper transporters), member 1                                    |
| 2.3   | SCARB2  | scavenger receptor class B, member 2                                                                 |      |          |                                                                                             |
| 2     | SCMH1   | sex comb on midleg                                                                                   | 2    | SLC31A2  | solute carrier family 31 (copper transporters),                                             |

|      |         |                                                                                                   |      |          |                                                                                 |
|------|---------|---------------------------------------------------------------------------------------------------|------|----------|---------------------------------------------------------------------------------|
|      |         | member 2                                                                                          |      |          | cerevisiae)                                                                     |
| 1.6  | SLC35A2 | solute carrier family 35 (UDP-galactose transporter), member A2                                   | 2.6  | SPHK1    | sphingosine kinase 1                                                            |
|      |         |                                                                                                   | 26.2 | SPOP     | speckle-type POZ protein                                                        |
| 1.5  | SLC35C2 | solute carrier family 35, member C2                                                               | 32.5 | SPRY4    | sprouty homolog 4 (Drosophila)                                                  |
| 3.5  | SLC35F2 | solute carrier family 35, member F2                                                               | 4.2  | SRD5A1   | steroid-5-alpha-reductase, alpha                                                |
| 1.5  | SLC38A6 | solute carrier family 38, member 6                                                                |      |          | polypeptide 1 (3-oxo-5                                                          |
| 1.5  | SLC39A6 | solute carrier family 39 (zinc transporter), member 6                                             | 9    | SREBF2   | alpha-steroid delta 4-dehydrogenase alpha 1)                                    |
| 3.9  | SLC39A8 | solute carrier family 39 (zinc transporter), member 8                                             | 2.1  | SRI      | sterol regulatory element binding transcription factor 2                        |
| 2    | SLC41A3 | solute carrier family 41, member 3                                                                | 1.5  | SRP72    | sorcin                                                                          |
| 1.8  | SLC43A1 | solute carrier family 43, member 1                                                                | 1.7  | SRPK1    | signal recognition particle 72kDa                                               |
| 28.4 | SLCO1B3 | solute carrier organic anion transporter family, member 1B3                                       | 58.5 | SRPRB    | SFRS protein kinase 1                                                           |
| 1.5  | SMAD2   | SMAD, mothers against DPP homolog 2 (Drosophila)                                                  | 2.4  | SS18     | signal recognition particle receptor, B subunit                                 |
| 3.5  | SMARCD2 | SWI/SNF related, matrix associated, actin dependent regulator of chromatin, subfamily d, member 2 | 14.9 | SSBP3    | synovial sarcoma translocation, chromosome 18                                   |
| 1.5  | SMN1    | survival of motor neuron 1, telomeric                                                             | 1.9  | STAT1    | single stranded DNA binding protein 3                                           |
| 1.5  | SNAI2   | snail homolog 2 (Drosophila)                                                                      | 1.7  | STK11    | signal transducer and activator of transcription 1, 91kDa                       |
| 2.2  | SNRPD1  | small nuclear ribonucleoprotein D1 polypeptide 16kDa                                              | 9.1  | STK6     | serine/threonine kinase 11 (Peutz-Jeghers syndrome)                             |
| 2.8  | SNRPE   | small nuclear ribonucleoprotein polypeptide E                                                     | 12.5 | STOM     | serine/threonine kinase 6                                                       |
| 1.5  | SNRPF   | small nuclear ribonucleoprotein polypeptide F                                                     | 10.7 | STX18    | stomatin                                                                        |
| 1.6  | SNRPG   | small nuclear ribonucleoprotein polypeptide G                                                     | 10.7 | STX18    | syntaxin 18                                                                     |
| 2.4  | SOCS2   | suppressor of cytokine signaling 2                                                                | 1.5  | SULT1A1  | syntaxin 18                                                                     |
| 2.1  | SOD1    | superoxide dismutase 1, soluble (amyotrophic lateral sclerosis 1 (adult))                         | 1.5  | SULT1A1  | sulfotransferase family, cytosolic, 1A, phenol-preferring, member 1             |
| 2.3  | SORBS3  | sorbin and SH3 domain containing 3                                                                | 7.9  | SULT1A3  | sulfotransferase family, cytosolic, 1A, phenol-preferring, member 3             |
| 59.9 | SORT1   | sortilin 1                                                                                        | 1.8  | SUMO3    | SMT3 suppressor of mif two 3 homolog 3 (yeast)                                  |
| 1.8  | SPCS3   | signal peptidase complex subunit 3 homolog (S.                                                    | 3.7  | SYPL1    | synaptophysin-like 1                                                            |
|      |         |                                                                                                   | 3.7  | SYPL1    | synaptophysin-like 1                                                            |
|      |         |                                                                                                   | 1.9  | TAF6     | TAF6 RNA polymerase II, TATA box binding protein (TBP)-associated factor, 80kDa |
|      |         |                                                                                                   | 1.6  | TANK     | TRAF family member-associated NFKB activator                                    |
|      |         |                                                                                                   | 2.5  | TAX1BP3  | Tax1 (human T-cell leukemia virus type I) binding protein 3                     |
|      |         |                                                                                                   | 2.2  | TBC1D22A | TBC1 domain family, member 22A                                                  |

|         |           |                                                                                |      |          |                                                                                    |
|---------|-----------|--------------------------------------------------------------------------------|------|----------|------------------------------------------------------------------------------------|
| 3.1     | TBC1D8    | TBC1 domain family, member 8 (with GRAM domain)                                | 1.8  | TNFRSF14 | tumor necrosis factor receptor superfamily, member 14 (herpesvirus entry mediator) |
| 1.5     | TCEAL1    | transcription elongation factor A (SII)-like 1                                 | 2.6  | TNFSF10  | tumor necrosis factor (ligand) superfamily, member 10                              |
| 2.3     | TCFL5     | transcription factor-like 5 (basic helix-loop-helix)                           | 2    | TNFSF13  | tumor necrosis factor (ligand) superfamily, member 13                              |
| 2.6     | TCP11L1   | t-complex 11 (mouse) like 1                                                    | 2.3  | TNFSF9   | tumor necrosis factor (ligand) superfamily, member 9                               |
| 1.5     | TEGT      | testis enhanced gene transcript (BAX inhibitor 1)                              | 3.7  | TOR1A    | torsin family 1, member A (torsin A)                                               |
| 3.2     | TENC1     | tensin like C1 domain containing phosphatase (tensin 2)                        | 2.6  | TOR1AIP1 | torsin A interacting protein 1                                                     |
| 2.9     | TFAM      | transcription factor A, mitochondrial                                          | 3.5  | TP53AP1  | TP53 activated protein 1                                                           |
| 9.5     | TFCP2     | transcription factor CP2                                                       | 2    | TPD52    | tumor protein D52                                                                  |
| 1.5     | TFDP1     | transcription factor Dp-1                                                      | 3.2  | TPM4     | tropomyosin 4                                                                      |
| 7.9     | TFDP2     | transcription factor Dp-2 (E2F dimerization partner 2)                         | 1.5  | TRAM1    | translocation associated membrane protein 1                                        |
| 5.1     | TFPI      | tissue factor pathway inhibitor (lipoprotein-associated coagulation inhibitor) | 2.2  | TRAPPC2  | trafficking protein particle complex 2                                             |
| 1.7     | TGDS      | TDP-glucose 4,6-dehydratase                                                    | 1.9  | TRAPPC4  | trafficking protein particle complex 4                                             |
| 8.3     | THAP10    | THAP domain containing 10                                                      | 2.7  | TRBC1    | T cell receptor beta constant 1                                                    |
| 1.6     | THG1L     | tRNA-histidine guanylyltransferase 1-like ( <i>S. cerevisiae</i> )             | 2.5  | TRIM68   | tripartite motif-containing 68                                                     |
| 2.5     | TIA1      | TIA1 cytotoxic granule-associated RNA binding protein                          | 2.7  | TSPAN3   | tetraspanin 3                                                                      |
| 3.4     | TIMM17A   | translocase of inner mitochondrial membrane 17 homolog A (yeast)               | 5.2  | TSPAN9   | tetraspanin 9                                                                      |
| 1.5     | TINF2     | TERF1 (TRF1)-interacting nuclear factor 2                                      | 3.8  | TTC19    | tetratricopeptide repeat domain 19                                                 |
| 4.2     | TK2       | thymidine kinase 2, mitochondrial                                              | 1.8  | TXNL2    | thioredoxin-like 2                                                                 |
| 1.9     | TMBIM4    | transmembrane BAX inhibitor motif containing 4                                 | 10.6 | UBA52    | ubiquitin A-52 residue ribosomal protein fusion product 1                          |
| 1.5     | TMCO1     | transmembrane and coiled-coil domains 1                                        | 1.8  | UBAP1    | ubiquitin associated protein 1                                                     |
| 1.5     | TMED9     | transmembrane emp24 protein transport domain containing 9                      | 1.5  | UBE2D3   | ubiquitin-conjugating enzyme E2D 3 (UBC4/5 homolog, yeast)                         |
| 1.9     | TMPO      | thymopoietin                                                                   | 4.5  | UBE2G1   | ubiquitin-conjugating enzyme E2G 1 (UBC7 homolog, yeast)                           |
| 9       | TMSB10    | thymosin, beta 10                                                              | 2.8  | UBE2J1   | ubiquitin-conjugating enzyme E2, J1 (UBC6 homolog, yeast)                          |
| 13218.9 | TNFRSF11B | tumor necrosis factor receptor superfamily, member 11b (osteoprotegerin)       | 4.4  | UBE2L3   | ubiquitin-conjugating enzyme E2L 3                                                 |
|         |           |                                                                                | 1.5  | UBE2L6   | ubiquitin-conjugating enzyme E2L 6                                                 |
|         |           |                                                                                | 1.5  | UBE2N    | ubiquitin-conjugating enzyme E2N (UBC13 homolog, yeast)                            |
|         |           |                                                                                | 2.5  | UBE2V1   | ubiquitin-conjugating enzyme E2 variant 1                                          |

|      |         |                                                                                           |                           |          |                                                                            |
|------|---------|-------------------------------------------------------------------------------------------|---------------------------|----------|----------------------------------------------------------------------------|
| 2.3  | UBE2V2  | ubiquitin-conjugating enzyme E2 variant 2                                                 |                           |          | (KOX 15)                                                                   |
| 1.5  | UBE3B   | ubiquitin protein ligase E3B                                                              | 3.6                       | ZNF232   | zinc finger protein 232                                                    |
| 3.5  | UBL3    | ubiquitin-like 3                                                                          | 1.7                       | ZNF239   | zinc finger protein 239                                                    |
| 1.9  | UBXD6   | UBX domain containing 6                                                                   | 1.5                       | ZNF277   | zinc finger protein 277                                                    |
| 1.7  | UCHL5IP | UCHL5 interacting protein                                                                 | 2.7                       | ZNF278   | zinc finger protein 278                                                    |
| 1.7  | UFC1    | ubiquitin-fold modifier conjugating enzyme 1                                              | 27                        | ZNF34    | zinc finger protein 34 (KOX 32)                                            |
| 3.5  | UNG2    | uracil-DNA glycosylase 2                                                                  | 4.5                       | ZNF410   | zinc finger protein 410                                                    |
| 2.4  | USP3    | ubiquitin specific peptidase 3                                                            | 13                        | ZNF435   | zinc finger protein 435                                                    |
| 1.7  | VBP1    | von Hippel-Lindau binding protein 1                                                       | 57.8                      | ZNF45    | zinc finger protein 45                                                     |
| 8.5  | VEGF    | vascular endothelial growth factor                                                        | 4.2                       | ZNF473   | zinc finger protein 473                                                    |
| 1.6  | VGFB    | VEGF nerve growth factor inducible                                                        | 8.3                       | ZNF673   | zinc finger protein 673                                                    |
| 6.4  | VPS37C  | vacuolar protein sorting 37C (yeast)                                                      | 25                        | ZNF768   | zinc finger protein 768                                                    |
| 1.6  | VRK3    | vaccinia related kinase 3                                                                 | 2                         | ZNF9     | zinc finger protein 9 (a cellular retroviral nucleic acid binding protein) |
| 3.2  | WASPIP  | Wiskott-Aldrich syndrome protein interacting protein                                      | 1.6                       | ZSCAN5   | zinc finger and SCAN domain containing 5                                   |
| 13.8 | WBP5    | WW domain binding protein 5                                                               | <b>Not Bound to Bound</b> |          |                                                                            |
| 1.7  | WDR23   | WD repeat domain 23                                                                       |                           | AASDHPPT | aminoadipate-semialdehyde dehydrogenase-phosphopantetheinyl transferase    |
| 5.8  | WDR62   | WD repeat domain 62                                                                       |                           | ABCA2    | ATP-binding cassette, sub-family A (ABC1), member 2                        |
| 1.9  | WHSC1   | Wolf-Hirschhorn syndrome candidate 1                                                      |                           | ACVR1    | activin A receptor, type I                                                 |
| 6.1  | WIPI2   | WD repeat domain, phosphoinositide interacting 2                                          |                           | ADAM10   | ADAM metallopeptidase domain 10                                            |
| 2.1  | WSB2    | WD repeat and SOCS box-containing 2                                                       |                           | ADH5     | alcohol dehydrogenase 5 (class III), chi polypeptide                       |
| 3.6  | XAB1    | XPA binding protein 1, GTPase                                                             |                           | AGA      | aspartylglucosaminidase                                                    |
| 2.1  | XAF1    | XIAP associated factor-1                                                                  |                           | AK2      | adenylate kinase 2                                                         |
| 7.9  | YWHAQ   | tyrosine 3-monooxygenase/tryptophan 5-monooxygenase activation protein, theta polypeptide |                           | ALDH1B1  | aldehyde dehydrogenase 1 family, member B1                                 |
| 3.4  | ZC3H14  | zinc finger CCCH-type containing 14                                                       |                           | ALDH3A2  | aldehyde dehydrogenase 3 family, member A2                                 |
| 1.5  | ZDHHC6  | zinc finger, DHHC-type containing 6                                                       |                           | ALMS1    | Alstrom syndrome 1                                                         |
| 1.7  | ZFP36   | zinc finger protein 36, C3H type, homolog (mouse)                                         |                           | AMD1     | adenosylmethionine decarboxylase 1                                         |
| 6.3  | ZNF133  | zinc finger protein 133 (clone pHZ-13)                                                    |                           | ANGPT1   | angiopoietin 1                                                             |
| 1.7  | ZNF143  | zinc finger protein 143 (clone pHZ-1)                                                     |                           | ANKRD49  | ankyrin repeat domain 49                                                   |
| 1.5  | ZNF22   | zinc finger protein 22                                                                    |                           | APOL2    | apolipoprotein L, 2                                                        |
|      |         |                                                                                           |                           | APS      | adaptor protein with pleckstrin homology and src homology 2 domains        |

|           |                                                                  |          |                                                                  |
|-----------|------------------------------------------------------------------|----------|------------------------------------------------------------------|
| ARIH2     | ariadne homolog 2 (Drosophila)                                   | C1orf121 | chromosome 1 open reading frame 121                              |
| ARL8B     | ADP-ribosylation factor-like 8B                                  | C1orf166 | chromosome 1 open reading frame 166                              |
| ARNTL2    | aryl hydrocarbon receptor nuclear translocator-like 2            | C1QDC1   | C1q domain containing 1                                          |
| ARSB      | arylsulfatase B                                                  | C20orf18 | chromosome 20 open reading frame 18                              |
| ASF1A     | ASF1 anti-silencing function 1 homolog A (S. cerevisiae)         | C20orf3  | chromosome 20 open reading frame 3                               |
| ASTE1     | asteroid homolog 1 (Drosophila)                                  | C21orf55 | chromosome 21 open reading frame 55                              |
| B2M       | beta-2-microglobulin                                             | C2orf24  | chromosome 2 open reading frame 24                               |
| B4GALT1   | UDP-Gal:betaGlcNAc beta 1,4-galactosyltransferase, polypeptide 1 | C2orf56  | chromosome 2 open reading frame 56                               |
| BAIAP2    | BAI1-associated protein 2                                        | C4orf16  | chromosome 4 open reading frame 16                               |
| BECN1     | beclin 1 (coiled-coil, myosin-like BCL2 interacting protein)     | C6orf62  | chromosome 6 open reading frame 62                               |
| BFSP1     | beaded filament structural protein 1, filensin                   | C6orf68  | chromosome 6 open reading frame 68                               |
| BNIP3L    | BCL2/adenovirus E1B 19kDa interacting protein 3-like             | C7orf25  | chromosome 7 open reading frame 25                               |
| BRD2      | bromodomain containing 2                                         | C8orf41  | chromosome 8 open reading frame 41                               |
| BRD9      | bromodomain containing 9                                         | CANT1    | calcium activated nucleotidase 1                                 |
| BRMS1     | breast cancer metastasis suppressor 1                            | CASP10   | caspase 10, apoptosis-related cysteine peptidase                 |
| BSDC1     | BSD domain containing 1                                          | CBX3     | chromobox homolog 3 (HP1 gamma homolog, Drosophila)              |
| BTF3      | basic transcription factor 3                                     | CCDC59   | coiled-coil domain containing 59                                 |
| BTN3A3    | butyrophilin, subfamily 3, member A3                             | CCNG2    | cyclin G2                                                        |
| BUB1      | BUB1 budding uninhibited by benzimidazoles 1 homolog (yeast)     | CCNJ     | cyclin J                                                         |
| BZW1      | basic leucine zipper and W2 domains 1                            | CCNT2    | cyclin T2                                                        |
| C14orf118 | chromosome 14 open reading frame 118                             | CDCA8    | cell division cycle associated 8                                 |
| C15orf39  | chromosome 15 open reading frame 39                              | CDH11    | cadherin 11, type 2, OB-cadherin (osteoblast)                    |
| C16orf34  | chromosome 16 open reading frame 34                              | CDK10    | cyclin-dependent kinase (CDC2-like) 10                           |
| C16orf5   | chromosome 16 open reading frame 5                               | CDKAL1   | CDK5 regulatory subunit associated protein 1-like 1              |
| C17orf70  | chromosome 17 open reading frame 70                              | CDS2     | CDP-diacylglycerol synthase (phosphatidate cytidyltransferase) 2 |
| C1orf108  | chromosome 1 open reading frame 108                              | CDV3     | CDV3 homolog (mouse)                                             |
|           |                                                                  | CERK     | ceramide kinase                                                  |
|           |                                                                  | CES2     | carboxylesterase 2 (intestine, liver)                            |
|           |                                                                  | CFLAR    | CASP8 and FADD-like apoptosis regulator                          |
|           |                                                                  | CH25H    | cholesterol 25-                                                  |

|          |                                                                                       |               |                                                                                       |
|----------|---------------------------------------------------------------------------------------|---------------|---------------------------------------------------------------------------------------|
|          | hydroxylase                                                                           | DCUN1D4       | DCN1, defective in cullin neddylation 1, domain containing 4 ( <i>S. cerevisiae</i> ) |
| CHCHD3   | coiled-coil-helix-coiled-coil-helix domain containing 3                               |               |                                                                                       |
| CHST4    | carbohydrate (N-acetylglucosamine 6-O) sulfotransferase 4                             | DDX17         | DEAD (Asp-Glu-Ala-Asp) box polypeptide 17                                             |
| CLK1     | CDC-like kinase 1                                                                     | DHODH         | dihydroorotate dehydrogenase                                                          |
| CLN8     | ceroid-lipofuscinosis, neuronal 8 (epilepsy, progressive with mental retardation)     | DHRS7         | dehydrogenase/reductase (SDR family) member 7                                         |
| COG5     | component of oligomeric golgi complex 5                                               | DKFZP564O0523 | hypothetical protein DKFZp564O0523                                                    |
| COL1A1   | collagen, type I, alpha 1                                                             | DLG1          | discs, large homolog 1 ( <i>Drosophila</i> )                                          |
| COX15    | COX15 homolog, cytochrome c oxidase assembly protein (yeast)                          | DLX4          | distal-less homeobox 4                                                                |
| CRBN     | cereblon                                                                              | DNAJB4        | DnaJ (Hsp40) homolog, subfamily B, member 4                                           |
| CREM     | cAMP responsive element modulator                                                     | DNAJC10       | DnaJ (Hsp40) homolog, subfamily C, member 10                                          |
| CRKL     | v-crk sarcoma virus CT10 oncogene homolog (avian)-like                                | DRAM          | damage-regulated autophagy modulator                                                  |
| CSG1cA-T | chondroitin sulfate glucuronyltransferase                                             | DYRK3         | dual-specificity tyrosine-(Y)-phosphorylation regulated kinase 3                      |
| CSNK1E   | casein kinase 1, epsilon                                                              | ECHDC1        | enoyl Coenzyme A hydratase domain containing 1                                        |
| CTAGE5   | CTAGE family, member 5                                                                | EDIL3         | EGF-like repeats and discoidin I-like domains 3                                       |
| CTBP1    | C-terminal binding protein 1                                                          | EGFR          | Epidermal growth factor receptor (EGFR)                                               |
| CTSO     | cathepsin O                                                                           | EIF2AK1       | eukaryotic translation initiation factor 2-alpha kinase 1                             |
| CUL1     | cullin 1                                                                              | EIF4E2        | eukaryotic translation initiation factor 4E family member 2                           |
| CXorf34  | chromosome X open reading frame 34                                                    | ELAVL1        | ELAV (embryonic lethal, abnormal vision, <i>Drosophila</i> )-like 1 (Hu antigen R)    |
| CXorf45  | chromosome X open reading frame 45                                                    | EPB41L4B      | erythrocyte membrane protein band 4.1 like 4B                                         |
| CYB561   | cytochrome b-561                                                                      |               |                                                                                       |
| CYP26B1  | cytochrome P450, family 26, subfamily B, polypeptide 1                                | EPN2          | epsin 2                                                                               |
| CYP2R1   | cytochrome P450, family 2, subfamily R, polypeptide 1                                 | ETFDH         | electron-transferring-flavoprotein dehydrogenase                                      |
| CYP51A1  | cytochrome P450, family 51, subfamily A, polypeptide 1                                | EVA1          | epithelial V-like antigen 1                                                           |
| DARS2    | aspartyl-tRNA synthetase 2 (mitochondrial)                                            | EXOC7         | exocyst complex component 7                                                           |
| DBF4     | DBF4 homolog ( <i>S. cerevisiae</i> )                                                 | EXTL2         | exostoses (multiple)-like 2                                                           |
| DCUN1D2  | DCN1, defective in cullin neddylation 1, domain containing 2 ( <i>S. cerevisiae</i> ) | EXTL3         | exostoses (multiple)-like 3                                                           |



|          |                                                                                                |           |                                                                                                                                      |
|----------|------------------------------------------------------------------------------------------------|-----------|--------------------------------------------------------------------------------------------------------------------------------------|
| FAIM     | Fas apoptotic inhibitory molecule                                                              | GDAP2     | ganglioside induced differentiation associated protein 2                                                                             |
| FAM32A   | family with sequence similarity 32, member A                                                   | GLB1L     | galactosidase, beta 1-like                                                                                                           |
| FAM46C   | family with sequence similarity 46, member C                                                   | GLMN      | glomulin, FKBP associated protein                                                                                                    |
| FAM69A   | Family with sequence similarity 69, member A                                                   | GLO1      | glyoxalase I                                                                                                                         |
| FANCC    | Fanconi anemia, complementation group C                                                        | GMFB      | glia maturation factor, beta                                                                                                         |
| FARP1    | FERM, RhoGEF (ARHGEF) and pleckstrin domain protein 1 (chondrocyte-derived)                    | GNA11     | guanine nucleotide binding protein (G protein), alpha 11 (Gq class)                                                                  |
| FBXL2    | F-box and leucine-rich repeat protein 2                                                        | GNL1      | guanine nucleotide binding protein-like 1                                                                                            |
| FBXL5    | F-box and leucine-rich repeat protein 5                                                        | GOLGA1    | golgi autoantigen, golgin subfamily a, 1                                                                                             |
| FEZ2     | fasciculation and elongation protein zeta 2 (zygin II)                                         | GRB2      | growth factor receptor-bound protein 2                                                                                               |
| FKBP14   | FK506 binding protein 14, 22 kDa                                                               | GTF2F2    | general transcription factor IIF, polypeptide 2, 30kDa                                                                               |
| FLJ11184 | hypothetical protein FLJ11184                                                                  | GTF2H1    | general transcription factor IIIH, polypeptide 1, 62kDa                                                                              |
| FNBP3    | formin binding protein 3                                                                       | GTF3C4    | general transcription factor IIIC, polypeptide 4, 90kDa                                                                              |
| FOXK2    | forkhead box K2                                                                                | H2AFY     | H2A histone family, member Y                                                                                                         |
| FRAT1    | frequently rearranged in advanced T-cell lymphomas                                             | H3F3A     | H3 histone, family 3A                                                                                                                |
| FZD6     | frizzled homolog 6 (Drosophila)                                                                | HADHB     | hydroxyacyl-Coenzyme A dehydrogenase/3-ketoacyl-Coenzyme A thiolase/enoyl-Coenzyme A hydratase (trifunctional protein), beta subunit |
| G6PC3    | glucose 6 phosphatase, catalytic, 3                                                            | HERC4     | hect domain and RLD 4                                                                                                                |
| GALNT1   | UDP-N-acetyl-alpha-D-galactosamine:polypeptide N-acetylgalactosaminyltransferase 1 (GalNAc-T1) | HFE       | hemochromatosis                                                                                                                      |
| GAPDH    | glyceraldehyde-3-phosphate dehydrogenase                                                       | HIP2      | huntingtin interacting protein 2                                                                                                     |
| GCAT     | glycine C-acetyltransferase (2-amino-3-ketobutyrate coenzyme A ligase)                         | HIST2H2BE | histone 2, H2be                                                                                                                      |
| GCLC     | glutamate-cysteine ligase, catalytic subunit                                                   | HLA-DPA1  | major histocompatibility complex, class II, DP alpha 1                                                                               |
| GCNT1    | glucosaminyl (N-acetyl) transferase 1, core 2 (beta-1,6-N-acetylglucosaminyltransferase)       | HMGA1     | high mobility group AT-hook 1                                                                                                        |
|          |                                                                                                | HMGN4     | high mobility group nucleosomal binding domain 4                                                                                     |
|          |                                                                                                | HNRPDL    | heterogeneous nuclear ribonucleoprotein D-like                                                                                       |
|          |                                                                                                | HTATSF1   | HIV TAT specific factor 1                                                                                                            |
|          |                                                                                                | HUS1      | HUS1 checkpoint homolog (S. pombe)                                                                                                   |

|          |                                                                           |           |                                                                            |
|----------|---------------------------------------------------------------------------|-----------|----------------------------------------------------------------------------|
| HYPK     | Huntingtin interacting protein K                                          | LBH       | limb bud and heart development homolog (mouse)                             |
| IDH3A    | isocitrate dehydrogenase 3 (NAD+) alpha                                   | LDLRAP1   | low density lipoprotein receptor adaptor protein 1                         |
| IDS      | iduronate 2-sulfatase (Hunter syndrome)                                   | LEPR      | leptin receptor                                                            |
| IFIT3    | interferon-induced protein with tetratricopeptide repeats 3               | LEPROT    | leptin receptor overlapping transcript                                     |
| IFNAR1   | interferon (alpha, beta and omega) receptor 1                             | LEPROTL1  | leptin receptor overlapping transcript-like 1                              |
| IGFBP3   | insulin-like growth factor binding protein 3                              | LIF       | leukemia inhibitory factor (cholinergic differentiation factor)            |
| IL27RA   | interleukin 27 receptor, alpha                                            | LMF2      | lipase maturation factor 2                                                 |
| IMPDH2   | IMP (inosine monophosphate) dehydrogenase 2                               | LOC127406 | similar to laminin receptor 1 (ribosomal protein SA)                       |
| IQCB1    | IQ motif containing B1                                                    | LOC145387 | LOC145387                                                                  |
| IRAK4    | interleukin-1 receptor-associated kinase 4                                | LOC63920  | transposon-derived Buster3 transposase-like                                |
| ITCH     | itchy homolog E3 ubiquitin protein ligase (mouse)                         | LOC92249  | hypothetical protein LOC92249                                              |
| ITM2B    | integral membrane protein 2B                                              | LPXN      | leupaxin                                                                   |
| ITPK1    | inositol 1,3,4-triphosphate 5/6 kinase                                    | M6PR      | mannose-6-phosphate receptor (cation dependent)                            |
| JMJD4    | jumonji domain containing 4                                               | MAEA      | macrophage erythroblast attacher                                           |
| KATNB1   | katanin p80 (WD repeat containing) subunit B 1                            | MAP2K3    | mitogen-activated protein kinase kinase 3                                  |
| KCNS3    | potassium voltage-gated channel, delayed-rectifier, subfamily S, member 3 | MAP3K7    | mitogen-activated protein kinase kinase kinase 7                           |
| KCTD2    | potassium channel tetramerisation domain containing 2                     | MBD4      | methyl-CpG binding domain protein 4                                        |
| KIAA0494 | KIAA0494                                                                  | MCM4      | MCM4 minichromosome maintenance deficient 4 (S. cerevisiae)                |
| KIAA0495 | KIAA0495                                                                  | MDH2      | malate dehydrogenase 2, NAD (mitochondrial)                                |
| KIAA0652 | KIAA0652                                                                  | MELK      | maternal embryonic leucine zipper kinase                                   |
| KIAA0892 | KIAA0892                                                                  | MGAT2     | mannosyl (alpha-1,6)-glycoprotein beta-1,2-N-acetylglucosaminyltransferase |
| KIAA0974 | KIAA0974 mRNA                                                             | MGC12760  | hypothetical protein MGC12760                                              |
| KIAA1128 | KIAA1128                                                                  | MGC3262   | hypothetical protein MGC3262                                               |
| KIAA2010 | KIAA2010                                                                  | MIPEP     | mitochondrial intermediate peptidase                                       |
| KLHL12   | kelch-like 12 (Drosophila)                                                |           |                                                                            |
| KRIT1    | KRIT1, ankyrin repeat containing                                          |           |                                                                            |
| LAP3     | leucine aminopeptidase 3                                                  |           |                                                                            |

|        |                                                                                                      |         |                                                                        |
|--------|------------------------------------------------------------------------------------------------------|---------|------------------------------------------------------------------------|
| MKRN1  | makorin, ring finger protein, 1                                                                      | OSR2    | odd-skipped related 2 (Drosophila)                                     |
| MMP24  | matrix metalloproteinase 24 (membrane-inserted)                                                      | PACS2   | phosphofurin acidic cluster sorting protein 2                          |
| MNS1   | meiosis-specific nuclear structural 1                                                                | PAICS   | phosphoribosylaminoimidazole carboxylase, phosphoribosylaminoimidazole |
| MON1B  | MON1 homolog B (yeast)                                                                               |         | succinocarboxamide synthetase                                          |
| MOSPD1 | motile sperm domain containing 1                                                                     | PAK4    | p21(CDKN1A)-activated kinase 4                                         |
| MRP63  | mitochondrial ribosomal protein 63                                                                   | PAM     | peptidylglycine alpha-amidating monooxygenase                          |
| MSRB2  | methionine sulfoxide reductase B2                                                                    | PARP16  | poly (ADP-ribose) polymerase family, member 16                         |
| MSTO1  | misato homolog 1 (Drosophila)                                                                        | PARVA   | parvin, alpha                                                          |
| MTCH1  | mitochondrial carrier homolog 1 (C. elegans)                                                         | PBLD    | phenazine biosynthesis-like protein domain containing                  |
| MTHFD2 | methylenetetrahydrofolate dehydrogenase (NADP+ dependent) 2, methenyltetrahydrofolate cyclohydrolase | PDCD4   | programmed cell death 4 (neoplastic transformation inhibitor)          |
| MTUS1  | mitochondrial tumor suppressor 1                                                                     | PDE8A   | phosphodiesterase 8A                                                   |
| MUM1   | melanoma associated antigen (mutated) 1                                                              | PDGFA   | platelet-derived growth factor alpha polypeptide                       |
| MXD4   | MAX dimerization protein 4                                                                           | PDLIM5  | PDZ and LIM domain 5                                                   |
| NDRG3  | NDRG family member 3                                                                                 | PHLDA1  | pleckstrin homology-like domain, family A, member 1                    |
| NET1   | neuroepithelial cell transforming gene 1                                                             | PIGO    | phosphatidylinositol glycan, class O                                   |
| NFIC   | nuclear factor I/C (CCAAT-binding transcription factor)                                              | PIP5K2A | phosphatidylinositol-4-phosphate 5-kinase, type II, alpha              |
| NFIL3  | nuclear factor, interleukin 3 regulated                                                              | PIP5K2B | phosphatidylinositol-4-phosphate 5-kinase, type II, beta               |
| NFKBIA | nuclear factor of kappa light polypeptide gene enhancer in B-cells inhibitor, alpha                  | PKP3    | plakophilin 3                                                          |
| NFYA   | nuclear transcription factor Y, alpha                                                                | PLA2G6  | phospholipase A2, group VI (cytosolic, calcium-independent)            |
| NR2C1  | nuclear receptor subfamily 2, group C, member 1                                                      | PLK4    | polo-like kinase 4 (Drosophila)                                        |
| NR2C2  | nuclear receptor subfamily 2, group C, member 2                                                      | POLR2D  | polymerase (RNA) II (DNA directed) polypeptide D                       |
| NR2F6  | nuclear receptor subfamily 2, group F, member 6                                                      | PPCS    | phosphopantothenoylecysteine synthetase                                |
| NRF1   | nuclear respiratory factor 1                                                                         | PPIC    | peptidylprolyl isomerase C (cyclophilin C)                             |
| NUDT13 | nudix (nucleoside diphosphate linked moiety X)-type motif 13                                         | PPM1G   | protein phosphatase 1G (formerly 2C), magnesium-dependent,             |

|         |                                                                                       |             |                                                          |
|---------|---------------------------------------------------------------------------------------|-------------|----------------------------------------------------------|
|         | gamma isoform                                                                         |             | oncogene family                                          |
|         |                                                                                       | RABIF       | RAB interacting factor                                   |
| PPP2CB  | protein phosphatase 2 (formerly 2A), catalytic subunit, beta isoform                  | RAD51L3     | RAD51-like 3 ( <i>S. cerevisiae</i> )                    |
| PRDM2   | PR domain containing 2, with ZNF domain                                               | RAP1GDS1    | RAP1, GTP-GDP dissociation stimulator 1                  |
| PRDX3   | peroxiredoxin 3                                                                       | RBMS3       | RNA binding motif, single stranded interacting protein   |
| PREI3   | preimplantation protein 3                                                             | RCC1        | regulator of chromosome condensation 1                   |
| PRKACB  | protein kinase, cAMP-dependent, catalytic, beta                                       | REXO2       | REX2, RNA exonuclease 2 homolog ( <i>S. cerevisiae</i> ) |
| PRPS1   | phosphoribosyl pyrophosphate synthetase 1                                             | RGL2        | ral guanine nucleotide dissociation stimulator-like 2    |
| PRR14   | proline rich 14                                                                       | RGS10       | regulator of G-protein signalling 10                     |
| PRSS3   | protease, serine, 3 (mesotrypsin)                                                     | RINT1       | RAD50 interactor 1                                       |
| PSMC3   | proteasome (prosome, macropain) 26S subunit, ATPase, 3                                | RIOK3       | RIO kinase 3 (yeast)                                     |
| PSMC3IP | PSMC3 interacting protein                                                             | RIPK1       | receptor (TNFRSF)-interacting serine-threonine kinase 1  |
| PSMD14  | proteasome (prosome, macropain) 26S subunit, non-ATPase, 14                           | RNF11       | ring finger protein 11                                   |
| PSPC1   | paraspeckle component 1                                                               | RNF13       | ring finger protein 13                                   |
| PSTPIP2 | proline-serine-threonine phosphatase interacting protein 2                            | RNF139      | ring finger protein 139                                  |
| PTDSS1  | phosphatidylserine synthase 1                                                         | RNF216      | ring finger protein 216                                  |
| PTEN    | phosphatase and tensin homolog (mutated in multiple advanced cancers 1)               | RNF24       | ring finger protein 24                                   |
| PTENP1  | phosphatase and tensin homolog (mutated in multiple advanced cancers 1), pseudogene 1 | RNF4        | ring finger protein 4                                    |
| PTN     | pleiotrophin (heparin binding growth factor 8, neurite growth-promoting factor 1)     | RNF44       | ring finger protein 44                                   |
| PTTG1IP | pituitary tumor-transforming 1 interacting protein                                    | RP4-692D3.1 | hypothetical protein LOC728621                           |
| PUS3    | pseudouridylate synthase 3                                                            | RPL12       | ribosomal protein L12                                    |
| PYGO1   | pygopus homolog 1 ( <i>Drosophila</i> )                                               | RPL13A      | ribosomal protein L13a                                   |
| RAB11A  | RAB11A, member RAS oncogene family                                                    | RPL15       | ribosomal protein L15                                    |
| RAB27B  | RAB27B, member RAS oncogene family                                                    | RPL18A      | ribosomal protein L18a                                   |
| RAB8A   | RAB8A, member RAS                                                                     | RPL21       | ribosomal protein L21                                    |
|         |                                                                                       | RPL22       | ribosomal protein L22                                    |
|         |                                                                                       | RPL28       | ribosomal protein L28                                    |
|         |                                                                                       | RPL31       | ribosomal protein L31                                    |
|         |                                                                                       | RPL38       | ribosomal protein L38                                    |
|         |                                                                                       | RPL5        | ribosomal protein L5                                     |
|         |                                                                                       | RPN1        | ribophorin I                                             |
|         |                                                                                       | RPS12       | ribosomal protein S12                                    |
|         |                                                                                       | RPS19       | ribosomal protein S19                                    |
|         |                                                                                       | RPS21       | ribosomal protein S21                                    |
|         |                                                                                       | RPS27A      | ribosomal protein S27a                                   |
|         |                                                                                       | RPS28       | ribosomal protein S28                                    |
|         |                                                                                       | RPS6        | ribosomal protein S6                                     |

|          |                                                                                                                  |         |                                                                                                   |
|----------|------------------------------------------------------------------------------------------------------------------|---------|---------------------------------------------------------------------------------------------------|
| RTF1     | Rtf1, Paf1/RNA polymerase II complex component, homolog (S. cerevisiae)                                          | SLC26A4 | solute carrier family 26, member 4                                                                |
| SAP18    | sin3-associated polypeptide, 18kDa                                                                               | SLC35E1 | solute carrier family 35, member E1                                                               |
| SC4MOL   | sterol-C4-methyl oxidase-like                                                                                    | SMAD5   | SMAD, mothers against DPP homolog 5 (Drosophila)                                                  |
| SCAMP1   | secretory carrier membrane protein 1                                                                             | SMARCD3 | SWI/SNF related, matrix associated, actin dependent regulator of chromatin, subfamily d, member 3 |
| SCAMP5   | secretory carrier membrane protein 5                                                                             |         |                                                                                                   |
| SCML1    | sex comb on midleg-like 1 (Drosophila)                                                                           | SMS     | spermine synthase                                                                                 |
| SCRN3    | secernin 3                                                                                                       | SNN     | stannin                                                                                           |
| SCYE1    | small inducible cytokine subfamily E, member 1 (endothelial monocyte-activating)                                 | SOD2    | superoxide dismutase 2, mitochondrial                                                             |
| SCYL3    | SCY1-like 3 (S. cerevisiae)                                                                                      | SP110   | SP110 nuclear body protein                                                                        |
| SDC2     | syndecan 2 (heparan sulfate proteoglycan 1, cell surface-associated, fibroglycan)                                | SP2     | Sp2 transcription factor                                                                          |
| SDC4     | syndecan 4 (amphiglycan, ryudocan)                                                                               | SPATA2L | spermatogenesis associated 2-like                                                                 |
| SDFR1    | stromal cell derived factor receptor 1                                                                           | SRR     | serine racemase                                                                                   |
| SEC11L1  | SEC11-like 1 (S. cerevisiae)                                                                                     | SSRP1   | structure specific recognition protein 1                                                          |
| SEMA4F   | sema domain, immunoglobulin domain (Ig), transmembrane domain (TM) and short cytoplasmic domain, (semaphorin) 4F | ST13    | suppression of tumorigenicity 13 (colon carcinoma) (Hsp70 interacting protein)                    |
| SEPT11   | septin 11                                                                                                        | STC1    | stanniocalcin 1                                                                                   |
| SERINC3  | serine incorporator 3                                                                                            | STCH    | stress 70 protein chaperone, microsome-associated, 60kDa                                          |
| SF3A1    | splicing factor 3a, subunit 1, 120kDa                                                                            | STK24   | serine/threonine kinase 24 (STE20 homolog, yeast)                                                 |
| SFN      | stratifin                                                                                                        | STOML1  | stomatin (EPB72)-like 1                                                                           |
| SFRS14   | splicing factor, arginine/serine-rich 14                                                                         | STX12   | syntaxin 12                                                                                       |
| SFXN3    | sideroflexin 3                                                                                                   | STX6    | syntaxin 6                                                                                        |
| SHOX2    | short stature homeobox 2                                                                                         | STX7    | syntaxin 7                                                                                        |
| SIRT5    | sirtuin (silent mating type information regulation 2 homolog) 5 (S. cerevisiae)                                  | STYK1   | serine/threonine/tyrosine kinase 1                                                                |
| SIX1     | sine oculis homeobox homolog 1 (Drosophila)                                                                      | SVIL    | supervillin                                                                                       |
| SKP1A    | S-phase kinase-associated protein 1A (p19A)                                                                      | SYBL1   | synaptobrevin-like 1                                                                              |
| SLC25A37 | solute carrier family 25, member 37                                                                              | TACSTD2 | tumor-associated calcium signal transducer 2                                                      |
|          |                                                                                                                  | TAF1A   | TATA box binding protein (TBP)-associated factor, RNA polymerase I, A, 48kDa                      |
|          |                                                                                                                  | TBXA2R  | thromboxane A2 receptor                                                                           |
|          |                                                                                                                  | TDP1    | tyrosyl-DNA phosphodiesterase 1                                                                   |
|          |                                                                                                                  | TERF1   | telomeric repeat binding factor (NIMA-                                                            |

|          |                                                                                 |         |                                                                                          |
|----------|---------------------------------------------------------------------------------|---------|------------------------------------------------------------------------------------------|
|          | interacting) 1                                                                  | VAPA    | VAMP (vesicle-associated membrane protein)-associated protein A, 33kDa                   |
| TES      | testis derived transcript (3 LIM domains)                                       | VPS24   | vacuolar protein sorting 24 (yeast)                                                      |
| TEX261   | testis expressed sequence 261                                                   | WDR46   | WD repeat domain 46                                                                      |
| TGFBR2   | transforming growth factor, beta receptor II (70/80kDa)                         | WDR48   | WD repeat domain 48                                                                      |
| TGIF2    | TGFB-induced factor 2 (TALE family homeobox)                                    | XPO6    | exportin 6                                                                               |
| THAP1    | THAP domain containing, apoptosis associated protein 1                          | XPO7    | exportin 7                                                                               |
| TIMM44   | translocase of inner mitochondrial membrane 44 homolog (yeast)                  | YRDC    | yrnC domain containing (E.coli)                                                          |
| TIMP3    | TIMP metallopeptidase inhibitor 3 (Sorsby fundus dystrophy, pseudoinflammatory) | YWHAZ   | tyrosine 3-monooxygenase/tryptophan 5-monooxygenase activation protein, zeta polypeptide |
| TM7SF1   | transmembrane 7 superfamily member 1 (upregulated in kidney)                    | ZBED1   | zinc finger, BED-type containing 1                                                       |
| TMEFF1   | transmembrane protein with EGF-like and two follistatin-like domains 1          | ZCCHC10 | zinc finger, CCHC domain containing 10                                                   |
| TNFRSF1A | tumor necrosis factor receptor superfamily, member 1A                           | ZCCHC4  | zinc finger, CCHC domain containing 4                                                    |
| TOB1     | transducer of ERBB2, 1                                                          | ZFAND1  | zinc finger, AN1-type domain 1                                                           |
| TOM1L1   | target of myb1-like 1 (chicken)                                                 | ZFP37   | zinc finger protein 37 homolog (mouse)                                                   |
| TPI1     | triosephosphate isomerase 1                                                     | ZNF177  | zinc finger protein 177                                                                  |
| TPK1     | thiamin pyrophosphokinase 1                                                     | ZNF227  | zinc finger protein 227                                                                  |
| TPM1     | tropomyosin 1 (alpha)                                                           | ZNF230  | zinc finger protein 230                                                                  |
| TTC4     | tetratricopeptide repeat domain 4                                               | ZNF306  | zinc finger protein 306                                                                  |
| TULP3    | tubby like protein 3                                                            | ZNF330  | zinc finger protein 330                                                                  |
| TWISTNB  | TWIST neighbor                                                                  | ZNF505  | zinc finger protein 505                                                                  |
| TXK      | TXK tyrosine kinase                                                             | ZNF557  | zinc finger protein 557                                                                  |
| TXNDC    | thioredoxin domain containing                                                   | ZNF675  | zinc finger protein 675                                                                  |
| UBE2NL   | ubiquitin-conjugating enzyme E2N-like                                           | ZWINT   | ZW10 interactor                                                                          |
| UFM1     | ubiquitin-fold modifier 1                                                       | ZXDC    | ZXD family zinc finger C                                                                 |
| UIMC1    | ubiquitin interaction motif containing 1                                        |         |                                                                                          |
| UQCRB    | ubiquinol-cytochrome c reductase binding protein                                |         |                                                                                          |
| VAMP3    | vesicle-associated membrane protein 3 (cellubrevin)                             |         |                                                                                          |
